## Research Paper

# Comparison of small biopsy specimens and surgical specimens for the detection of EGFR mutations and EML4-ALK in non-small-cell lung cancer

DeSheng Xiao<sup>1,2</sup>, Can Lu<sup>1,2</sup>, Wei Zhu<sup>1,2</sup>, QiuYan He<sup>1,2</sup>, Yong Li<sup>1,2</sup>, ChunYan Fu<sup>1,2</sup>, JianHua Zhou<sup>1,2</sup>, Shuang Liu<sup>6</sup>, YongGuang Tao<sup>3,4,5,6</sup>

<sup>1</sup>Department of Pathology, Xiangya Hospital, Central South University, Changsha, Hunan 410078 China

<sup>2</sup>Department of Pathology, School of Basic Medicine, Central South University, Changsha, Hunan 410078 China

<sup>3</sup>Cancer Research Institute, School of Basic Medicine, Central South University, Changsha, Hunan, 410078 China

<sup>4</sup>Key Laboratory of Carcinogenesis and Cancer Invasion (Central South University), Ministry of Education, Hunan, 410078 China

<sup>5</sup>Key Laboratory of Carcinogenesis (Central South University), Ministry of Health, Hunan, 410078 China

<sup>6</sup>Center for Medicine Research, Xiangya Hospital, Central South University, Changsha, Hunan, 410008 China

**Correspondence to:** YongGuang Tao, **email:** taoyong@csu.edu.cn

**Keywords:** EGFR, EML4-ALK, small biopsy specimens, surgical specimens, non-small-cell lung carcinoma

**Received:** March 29, 2016

**Accepted:** May 29, 2016

**Published:** June 14, 2016

## ABSTRACT

**Epidermal growth factor receptor (EGFR) mutations and anaplastic lymphoma kinase (ALK) fusion genes represent novel oncogenes that are associated with non-small-cell lung cancers (NSCLC). The feasibility of detecting EGFR mutations and ALK fusion genes in small biopsy specimens or surgical specimens was determined. Of the 721 NSCLC patients, a total of 305 cases were positive for EGFR mutations (42.3%). The rate of EGFR mutations in women was significantly higher than that in men. Histologically, the EGFR mutation rate in adenocarcinomas was significantly higher than that in squamous cell carcinomas. No difference in the EGFR mutation rate was observed between surgical specimens (42.1%) and small biopsy specimens (42.4%), which indicated that the EGFR mutation ratios in surgical specimens and small biopsy specimens were not different. In 385 NSCLC patients, 26 cases were positive for EML4-ALK (6.8%). However, 11.7% of the surgical specimens were EML4-ALK-positive, whereas the positive proportion in the small biopsy specimens was only 4.7%, which indicated that EML4-ALK-positive rate in the surgical specimens was significantly higher than that in the small biopsy specimens. Detection of EGFR gene mutations was feasible in small biopsy specimens, and screening for EML4-ALK expression in small biopsy specimens can be used to guide clinical treatments.**

## INTRODUCTION

The global cancer burden is growing at an alarming rate, which drives an urgent need for the implementation of effective prevention strategies. Lung cancer is one of the most critical types [1]. The 5-year relative survival rate of lung cancer patients is gradually improving due to improvements in treatment. In China, lung cancer is the most common incident cancer and the leading of cancer death [2]. Lung cancer is classified by histological criteria into non-small cell lung carcinoma (NSCLC), which consists of three main subtypes (adenocarcinoma,

squamous cell carcinoma, and large cell carcinoma), and small cell lung carcinoma. Rare subtypes include glandular tumors, carcinoid tumors, and undifferentiated carcinomas.

Epidermal growth factor receptor (EGFR) mutations are the first druggable targets discovered in NSCLC [3]. Two classes of EGFR mutations, exon 19 deletions and exon 21 substitutions, account for the majority of the EGFR mutations reported (~90%). These mutations are correlated with better responses to gefitinib, erlotinib and afatinib [4–6]. Furthermore, these mutations are more frequently observed in Asian populations, never-smokers,

females, and patients with adenocarcinoma [7]. An inverse relationship between cumulative smoking pack-years and the frequency of EGFR mutations has widely been reported [8], which suggests that smoking status has some predictive value for the presence of EGFR mutations. However, the association between source of specimen and EGFR mutations remains controversial, and few data are available regarding the predictive value of the source in specimens for EGFR mutations.

The fusion of the Echinoderm microtubule-associated protein like-4 (EML4) and anaplastic lymphoma kinase (ALK) represents another distinct type of mutation that may drive the development of NSCLC. The fusion protein is highly oncogenic both *in vitro* and *in vivo* and results in the constitutive activation of the ALK pathway and ultimately cancer development [9]. Several clinical trials have demonstrated the remarkable efficacy of crizotinib for the treatment of metastatic NSCLC in patients who harbor ALK rearrangements. These results led to the approval of this agent by the US Food and Drug Administration and the European Medicines Agency [10–13]. EML4-ALK rearrangements were reported to be primarily associated with younger age at diagnosis and with adenocarcinoma [14]. However, the impact of the source of specimens in predicting EML4-ALK rearrangements has not been established.

One of the most challenging problems in clinical practice is the acquisition of adequate tumor tissues for analysis. Therefore, the use of available clinicopathological data to predict the likelihood of certain genetic aberrations is of special significance. Furthermore, EML4-ALK rearrangements and EGFR mutations represent two distinct oncogenic mechanisms that might have different clinicopathological features. With ongoing improvements in modern medical technology, many types of biopsies are widely used in clinic. A small biopsy involves taking a small piece of diseased tissue for pathologic examination for the purposes of obtaining a preoperative diagnosis and optimizing the corresponding treatment. The means for this type of sampling include bronchial fiberoptic techniques, ultrasonic bronchoscopy or percutaneous lung biopsy [15, 16]. The advantages of small biopsies are that they are minimally invasive, simple operations with fewer complications and greater patient acceptance that can generally be performed as outpatient procedures. Furthermore, diagnosis is possible in the vast majority of cases. These techniques have wide clinical uses. Therefore, many small biopsy specimens are used to detect gene mutations. Compared with surgical specimens, the small biopsy specimens may have a low proportion, smaller numbers, and a scattered distribution of the tumor cells. In contrast to histopathologic diagnosis, IHC and genetic testing results, it is difficult to enrich the tumor cells. For small biopsy specimens, simple and rapid detection methods with high sensitivity and strong specificity are required. Here, we detected EGFR

mutations using the amplification refractory mutation system (ARMS) in 721 NSCLC patients and measured EML4-ALK expression with the VENTANA ALK (D5F3) immunohistochemistry (IHC) method in 385 NSCLC patients to determine the feasibility of using small biopsy specimens for genetic testing and immunohistochemical detection.

## RESULTS

### ARMS analysis detected EGFR mutations in 721 NSCLC cases

Samples from a total of 721 NSCLC patients evaluated for EGFR mutations. The mean age of the subjects was 65 years (ranging from 16 to 85). Of these patients, 437 (60.6%) were male and 284 (39.4%) were female. Histologically, 583 (80.8%) of the specimens were lung adenocarcinomas, 119 (16.5%) were squamous cell carcinomas, 10 (1.4%) were adenosquamous carcinomas, 5 (0.7%) were large cell carcinomas, and 4 (0.6%) were non-small cell lung cancers (unspecified type).

EGFR mutations were detected in a total of 305 patients (42.3%): the identified mutations included 155 cases of 19-del (50.8%, Figure 1A), 118 cases of L858R mutations (38.7%, Figure 1B), 4 cases of L861Q mutations (1.3%), 6 cases of G719X mutations (2.0%), 2 cases of S768I mutations (0.7%), and 7 cases of 20-in (2.0%). Single mutations in exons 19 and 21 accounted for 90.8% of all mutations, and single mutations in exons 18 and 20 accounted for 4.9% of all mutations. In addition, 13 cases with double locus mutations, including 3 cases with both 19-del and L858R (Figure 1C), 6 cases with both L858R and T790M (Figure 1D), 2 cases with both 19-del and L861Q, 1 case with both G719X and L861Q, and 1 case with L858R and an exon 20 insertion mutation.

### The correlation between EGFR gene mutations and the lung cancer clinical pathological indicators

EGFR mutation testing results showed that the EGFR mutation rate in the female patients was 59.5% (169/284), which was significantly higher ( $P<0.01$ ) than that of male patients (31.1%, 136/437). With respect to the histological types, the EGFR mutation rate among the lung adenocarcinomas (46.9%), was significantly higher than that observed in the squamous cell carcinomas (10.1%) ( $P<0.01$ ) (Table 1).

### The comparison of EGFR mutation rate between small biopsy and surgical specimens for different clinical pathological indicators

Among the 721 NSCLC patients, the EGFR mutation rate detected in the surgical specimens (42.1%)

was not significantly different from that of the small biopsy specimens (42.4%) ( $P > 0.05$ ) (Table 2). With respect to gender and the histological types, the differences between the EGFR mutation rates for the small biopsy and surgical specimens was not statistically significant ( $P > 0.05$ ). Furthermore, the differences in the 19-Del and L858R mutation rates between the small biopsy and surgical specimens were also not statistically significant ( $P > 0.05$ ) (Table 3).

### The comparison of EML4 - ALK positive rate between small biopsy and surgical specimens

A total of 385 NSCLC patients were recruited for the detection of EML4-ALK. The mean age of these subjects was 63 years, with a range of 17 to 83. Of these patients, 240 (62.3%) were male and 145 (37.7%) were female. Histologically, 293 (76.1%) of the specimens were lung adenocarcinomas and 92 (23.9%) were squamous cell carcinomas. We detected 26 EML4-ALK-positive cases (Figure 2) for a total positive rate of 6.8%. Of these positive cases, 13 were identified in surgical specimens (11.7%) whereas 13 of the small biopsy specimens were positive (4.7%). The EML4-ALK positive rate of the surgical specimens was thus significantly higher than that of the small biopsy specimens ( $P < 0.05$ ). With respect to gender and the histological types, the EML4-ALK positive rate of the surgical specimens was also significantly higher than the small biopsy specimens ( $P < 0.05$ ) (Table 4)

## DISCUSSION

In clinical practice, the discrimination of EGFR mutations and ALK rearrangements in NSCLC has critical therapeutic implications. EGFR mutations confer sensitivity to EGFR tyrosine kinase inhibitors (TKIs) whereas patients with ALK rearrangements response well to ALK TKIs. However, ALK rearrangements are associated with resistance to EGFR TKIs. Because some features including adenocarcinoid histology and sample source are common to both EML4-ALK rearrangements and EGFR mutations, it is important to investigate other distinct features of these two genetic aberrations from the same samples. To our knowledge, this is the first study to investigate the relationship between the clinicopathological features and the presence of EML4-ALK rearrangements and EGFR mutations in the small biopsy specimens.

In the context of a significantly higher incidence of lung cancer in recent years, targeted molecular therapy has become an important treatment approach for patients with lung cancer. Among these targeted therapeutic agents, TKI based on the EGFR mutations have been widely used in the clinic, and the ability to provide information on the EGFR mutations in clinical tumor tissues with the goal of guiding targeted therapy in a timely manner has become an important goal of lung cancer molecular detection [17–20]. However, approximately 70–85% of new lung cancers are not suitable for surgical therapy, which means

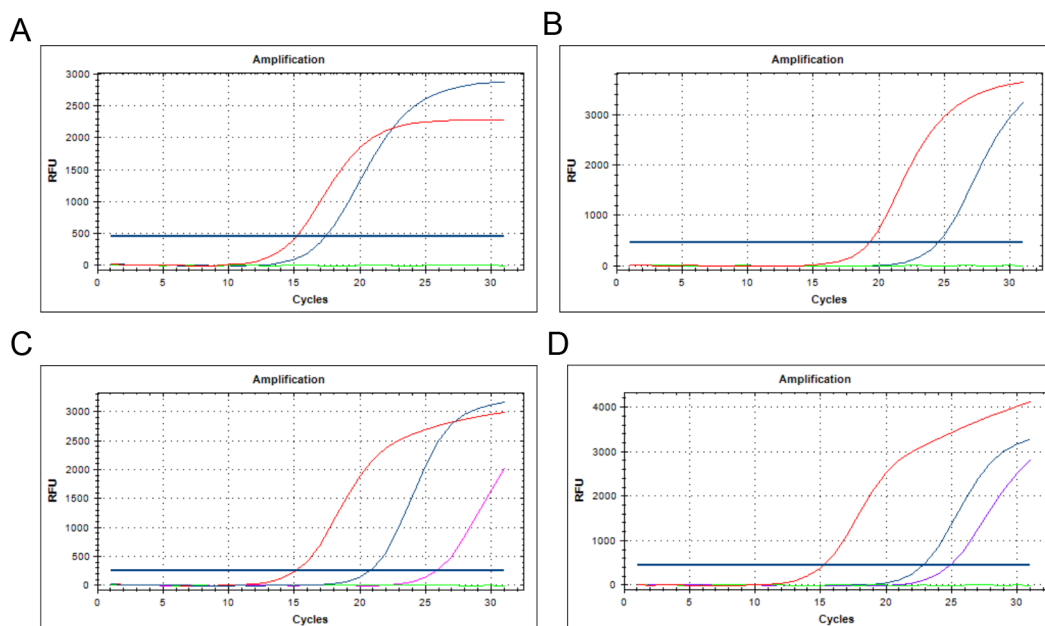

**Figure 1: The ARMS method was used to detect EGFR gene mutations including the exon 19 deletion A. exon 21 L858R point mutation B. the combination of the 19-del and L858R mutation C. and L858R and T790M mutations D.**

**Table 1: The correlation between EGFR gene mutation and lung cancer clinical pathological indicators**

| Group              | Total cases | Mutation cases | Mutation rate | P     |
|--------------------|-------------|----------------|---------------|-------|
| Male               | 437         | 136            | 31.1%         | 0.000 |
| Female             | 284         | 169            | 59.5%         |       |
| Adenocarcinoma     | 584         | 274            | 46.9%         | 0.000 |
| Squamous carcinoma | 109         | 11             | 10.1%         |       |

**Table 2: EGFR mutation rate analysis in 721 NSCLC patients**

|                        | Total cases | mutation cases | mutation rate | P     |
|------------------------|-------------|----------------|---------------|-------|
| Surgical specimens     | 171         | 72             | 42.1%         | 0.952 |
| Small biopsy specimens | 550         | 233            | 42.4%         |       |
| Total                  | 721         | 305            | 42.3%         |       |

**Table 3: Comparison of the EGFR mutation rates for small biopsy and surgical specimens**

|                    |                        | Total cases | mutation cases | mutation rate | P     |
|--------------------|------------------------|-------------|----------------|---------------|-------|
| Male               | Surgical specimens     | 112         | 33             | 29.5%         | 0.661 |
|                    | Small biopsy specimens | 325         | 103            | 31.7%         |       |
| Female             | Surgical specimens     | 59          | 39             | 66.1%         | 0.246 |
|                    | Small biopsy specimens | 225         | 130            | 57.8%         |       |
| Adenocarcinoma     | Surgical specimens     | 139         | 70             | 50.4%         | 0.787 |
|                    | Small biopsy specimens | 416         | 204            | 49%           |       |
| Squamous carcinoma | Surgical specimens     | 23          | 2              | 9.4%          | 0.920 |
|                    | Small biopsy specimens | 96          | 9              | 10.4%         |       |
| 19-Del             | Surgical specimens     | 171         | 40             | 23.4%         | 0.490 |
|                    | Small biopsy specimens | 550         | 115            | 20.9%         |       |
| L858R              | Surgical specimens     | 171         | 30             | 17.5%         | 0.634 |
|                    | Small biopsy specimens | 550         | 88             | 16.0%         |       |

that only small biopsy specimens that can be obtained by puncture or bronchial microscopic biopsy are available for diagnosis or further genetic testing [21].

We use the ARMS method to detect EGFR mutations in the primary NSCL cases. In these samples, 305 positive mutations were detected, with 19-Del and L858R mutations being the most common. Some rare mutations and double locus mutations were also observed. The results showed that the EGFR mutation rate in the

women was significantly higher than in the men. With respect to the histological type, the EGFR mutation rate in adenocarcinomas was significantly higher than that in squamous cell carcinomas, which is consistent with other reports. We also found no significant difference between the observed EGFR mutation rates in the surgical specimens and small biopsy specimens. More specifically, there were no significant differences between the small biopsy and surgical specimens with respect to the 19-Del

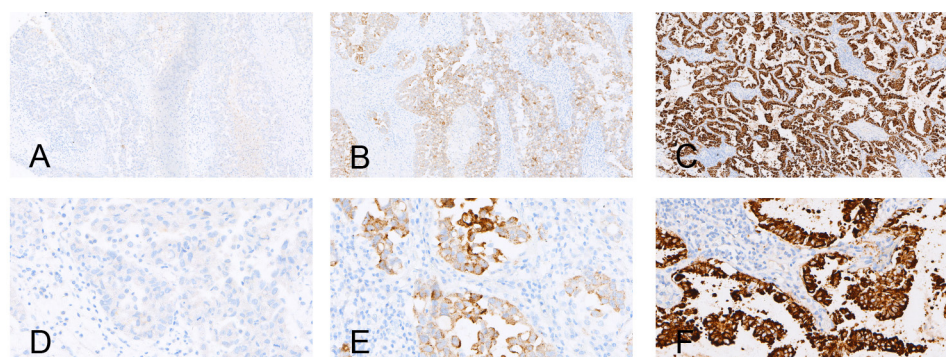

**Figure 2: Examples of the immunohistochemical analysis of EML4-ALK.** A, B, and C. show the negative control, positive control and an EML4-ALK (+) case (strong granular cytoplasmic staining) ( $\times 100$ ), respectively; D, E, and F. show the negative control, positive control and an EML4-ALK (+) case (strong granular cytoplasmic staining) ( $\times 400$ ), respectively.

**Table 4: The comparison of the EML4-ALK-positive rates for small biopsy and surgical specimens**

|                    |                        | Total cases | Positive cases | positive incidence | P     |
|--------------------|------------------------|-------------|----------------|--------------------|-------|
| Total cases        | Surgical specimens     | 111         | 13             | 11.7%              | 0.014 |
|                    | small biopsy specimens | 274         | 13             | 4.7%               |       |
| Male               | Surgical specimens     | 74          | 8              | 10.8%              | 0.002 |
|                    | small biopsy specimens | 166         | 3              | 1.8%               |       |
| Female             | Surgical specimens     | 37          | 5              | 13.5%              | 0.463 |
|                    | small biopsy specimens | 108         | 10             | 9.3%               |       |
| Adenocarcinoma     | Surgical specimens     | 85          | 10             | 11.8%              | 0.205 |
|                    | small biopsy specimens | 208         | 15             | 7.2%               |       |
| Squamous carcinoma | Surgical specimens     | 22          | 1              | 4.5%               | 0.073 |
|                    | small biopsy specimens | 70          | 0              | 0                  |       |

and L858R mutation rates. The findings suggest that the specificity and sensitivity for the detection of EGFR gene mutations are consistent between the small biopsy specimens and surgical specimens. Furthermore, the use of small biopsy specimens for EGFR gene mutation detection is completely feasible.

The anaplastic lymphoma kinase (EML4-ALK) fusion gene is an important biological marker of NSCLC. EML4 and ALK are two genes located in p21 and p23 of human chromosome 2, approximately 10 MB apart. Inversion fusion of the two genes can produce the new fusion protein, EML4-ALK [22, 23]. The identification of EML4-ALK-positive tumors is very important for NSCLC patients because ALK tyrosine kinase inhibitors may shrink tumors that are EML4-ALK positive. Crizotinib,

an oral ALK inhibitor, has been shown to be an important inhibitor of tumor growth and survival that reduces or slows tumor growth [12, 24]. The identification of new methods for the identification of gene mutations in tumors is important in the development of targeted therapeutic agents.

Currently, the principal detection methods for EML4-ALK include FISH, RT-PCR and IHC [25–29]. Because manual performance of the FISH technique is difficult, time consuming, difficult to standardize and requires fluorescence microscopy, it is not widely used for EML4-ALK screening. Furthermore, RT-PCR is also not recommended for the detection of EML4-ALK rearrangements because there are subtypes of the EML4-ALK rearrangements, and RT-PCR can only detect

known mutations. In addition, there are more stringent requirements for the sample preparation due to the rapid degradation of RNA. The IHC method using Roche/VENTANA ALK IHC (D5F3) detection system is the easiest to perform. This technique uses a kit containing high sensitivity/specific ALK antibodies (D5F3) with enhanced second antibody and amplification reagents. Detection of the EML4-ALK protein was tested in the BenchMark series fully automatic immunohistochemical instrument, and the test results were reported as a simple binary score (negative/positive) [30, 31]. We showed that the EML4-ALK-positive rate for the surgical specimens was significantly higher than that for the small biopsy specimens. Independent of the gender and histological types, the EML4-ALK positive rate of surgical specimens was significantly higher than that of the small biopsy specimens. Clearly, the use of small biopsy specimens had an effect on the EML4-ALK positive rate on the basis that they provided smaller quantities of tissue protein. The expression of EML4-ALK was detected by using Roche/VENTANA ALK IHC detection system from the protein expression level and the sensitivity is lower than that from the DNA expression. Moreover, more tumor tissues are needed to get a satisfactory result from the DNA expression level. Therefore, detection of EML4-ALK from small biopsy specimens is better than that from surgical specimens.

In summary, we showed that the use of small biopsy specimens for the detection of EGFR gene mutations was highly feasible. Immunohistochemical analysis was a more suitable method for the detection of EML4-ALK in surgical specimens than in small biopsy specimens. Furthermore, it is a good reference index by screening EML4-ALK expression in small biopsy specimens to guide clinical medicine. The results should improve the assessment of the likelihood of these two genetic aberrations based on available clinicopathological features as well as the understanding of the biological implications of different oncogenic mutations as evaluated in small biopsy specimens.

## **MATERIALS AND METHODS**

### **Ethics, consent and permissions**

Approval to review, analyze, and publish the data in this study was given by the Ethics Board of Xiangya Hospital of Central South University. Written informed consent for the collection of medical information was obtained from all patients at their first visit.

### **Clinical data**

We collected 721 primary NSCLC specimens from the Xiangya Hospital of Central South University between January 2015 and December 2015 for the detection of EGFR gene mutations. The specimens included 171

surgical specimens and 550 small biopsy specimens. The small biopsy specimens included 281 cases of biopsies collected using CT-guided percutaneous lung puncture, 226 bronchoscopy tissues, 28 samples of exfoliated cell pellets from pleural effusions, and 15 lymph node-puncture tissues. All specimens were obtained before treatment, fixed with 4% neutral formaldehyde, and embedded in paraffin.

We collected 385 primary NSCLC specimens at the Xiangya Hospital of Central South University between January 2015 and December 2015 for VENTANA ALK (D5F3) immunohistochemical detection. These samples included 111 surgical specimens and 274 small biopsy specimens. The small biopsy specimens included 153 biopsies collected using CT-guided percutaneous lung puncture, 102 bronchoscopy tissues, 14 samples of exfoliated cell pellets from pleural effusions, and 5 lymph node-puncture tissues. All specimens were obtained before treatment, fixed with 4% neutral formaldehyde, and embedded in paraffin.

### **Reagents**

The AmoyDx DNA extraction kit and human EGFR gene mutation detection kit (PCR fluorescence probe method) were purchased from Amoy Diagnostics Co Ltd, Xiamen, China; the anti-ALK (D5F3) rabbit monoclonal antibody, Ventana OptiView signal amplification kit, OptiViewIHC detection kits, rabbit monoclonal negative quality control antibody and quality control slice were obtained from Roche Diagnostics Product Co. LTD, Tucson, U.S.A.

### **DNA extraction**

A total of 10 pieces 5-8 microns thick were sectioned from wax blocks selected from those with more tumor tissues, and 75% alcohol was used to sterilize the equipment between each case to prevent cross contamination. The tumor tissue genomic DNA was extracted using an AmoyDx DNA extraction kit. After the extraction of the DNA, its concentration and quality were evaluated using a Nanodrop ultramicro spectrophotometer, with a quality criterion of  $1.7 < OD_{260} / OD_{280} < 2.1$ .

### **ARMS analysis**

Mutational analysis of the EGFR was carried out according to the ARMS method using a human EGFR gene mutation detection kit (PCR fluorescence probe method) from Amoy Diagnostics Company [32–34]. We detected 29 mutations in 4 exons of the EGFR gene using this procedure. These included three point mutations of G719X in exon 18; 19 deletion mutations in exon 19; T790M, S768I and 3 insertion mutations in exon 20; and L858R and L861Q point mutations in exon 21. The EGFR mutations were detected using CFX96-type fluorescent

quantitative PCR from Bio-Rad company. Each batch of reactions was set up to include simultaneous positive and negative controls. After the reaction, the fluorescent signal curves and the threshold line were used to interpret the mutation results.

## VENTANA immunohistochemical analysis

After 3 mm thick paraffin slices were baked, the slices were dyed directly using the Benchmark XT automatic immunohistochemical dyeing machine (American VENTANA company). The dyeing procedure was performed according to the instructions provided with the kit. The test results were evaluated using light microscopy. A binary method of interpretation was used as follows: strong granular cytoplasmic staining (any percentage) in the tumor cells was scored EML4-ALK (+), otherwise they were scored EML4-ALK (-).

## Statistical analysis

The chi-square test (or Fisher exact test) and independent samples test were applied to explore the univariate association between the clinicopathological variables and the specific genetic aberrations for the categorical and continuous data for EGFR and EML4-ALK, respectively. All statistical calculations were performed using SPSS version 19.0 (SPSS, Inc., Chicago, IL.) A two-tailed P value of 0.05 was considered significant.

## ACKNOWLEDGMENTS

We would like to thank all laboratory members for their critical discussion of this manuscript.

This work was supported by the National Basic Research Program of China [2015CB553903(Y.T.)]; the National Natural Science Foundation of China [81271763(S.L.), 81372427(Y.T.), and 81302354]; and the Hunan Natural Science Foundation of China [12JJ1013(Y.T.)].

## CONFLICTS OF INTEREST

The authors declare no conflict of interest. This manuscript has been read and approved by all of the authors and has neither been submitted nor is under consideration for publication elsewhere.

## REFERENCES

1. Siegel RL, Miller KD, Jemal A. Cancer statistics, 2015. *CA Cancer J Clin.* 2015; 65: 5-29. doi: 10.3322/caac.21254.
2. Chen W, Zheng R, Baade PD, Zhang S, Zeng H, Bray F, Jemal A, Yu XQ, He J. Cancer statistics in China, 2015. *CA Cancer J Clin.* 2016; 66: 115-32. doi: 10.3322/caac.21338.
3. Lynch TJ, Bell DW, Sordella R, Gurubhagavatula S, Okimoto RA, Brannigan BW, Harris PL, Haserlat SM, Supko JG, Haluska FG, Louis DN, Christiani DC, Settleman J, et al. Activating mutations in the epidermal growth factor receptor underlying responsiveness of non-small-cell lung cancer to gefitinib. *N Engl J Med.* 2004; 350: 2129-39. doi: 10.1056/NEJMoa040938.
4. Mitsudomi T, Morita S, Yatabe Y, Negoro S, Okamoto I, Tsurutani J, Seto T, Satouchi M, Tada H, Hirashima T, Asami K, Katakami N, Takada M, et al. Gefitinib versus cisplatin plus docetaxel in patients with non-small-cell lung cancer harbouring mutations of the epidermal growth factor receptor (WJTOG3405): an open label, randomised phase 3 trial. *Lancet Oncol.* 2010; 11: 121-8. doi: 10.1016/S1470-2045(09)70364-X.
5. Rosell R, Carcereny E, Gervais R, Vergnenegre A, Massuti B, Felip E, Palmero R, Garcia-Gomez R, Pallares C, Sanchez JM, Porta R, Cobo M, Garrido P, et al. Erlotinib versus standard chemotherapy as first-line treatment for European patients with advanced EGFR mutation-positive non-small-cell lung cancer (EURTAC): a multicentre, open-label, randomised phase 3 trial. *Lancet Oncol.* 2012; 13: 239-46. doi: 10.1016/S1470-2045(11)70393-X.
6. Wu YL, Zhou C, Hu CP, Feng J, Lu S, Huang Y, Li W, Hou M, Shi JH, Lee KY, Xu CR, Massey D, Kim M, et al. Afatinib versus cisplatin plus gemcitabine for first-line treatment of Asian patients with advanced non-small-cell lung cancer harbouring EGFR mutations (LUX-Lung 6): an open-label, randomised phase 3 trial. *Lancet Oncol.* 2014; 15: 213-22. doi: 10.1016/S1470-2045(13)70604-1.
7. Shi Y, Au JS, Thongprasert S, Srinivasan S, Tsai CM, Khoa MT, Heeroma K, Itoh Y, Cornelio G, Yang PC. A prospective, molecular epidemiology study of EGFR mutations in Asian patients with advanced non-small-cell lung cancer of adenocarcinoma histology (PIONEER). *J Thorac Oncol.* 2014; 9: 154-62. doi: 10.1097/JTO.000000000000033.
8. Pham D, Kris MG, Riely GJ, Sarkaria IS, McDonough T, Chuai S, Venkatraman ES, Miller VA, Ladanyi M, Pao W, Wilson RK, Singh B, Rusch VW. Use of cigarette-smoking history to estimate the likelihood of mutations in epidermal growth factor receptor gene exons 19 and 21 in lung adenocarcinomas. *J Clin Oncol.* 2006; 24: 1700-4. doi: 10.1200/JCO.2005.04.3224.
9. Soda M, Choi YL, Enomoto M, Takada S, Yamashita Y, Ishikawa S, Fujiwara S, Watanabe H, Kurashina K, Hatanaka H, Bando M, Ohno S, Ishikawa Y, et al. Identification of the transforming EML4-ALK fusion gene in non-small-cell lung cancer. *Nature.* 2007; 448: 561-6. doi: 10.1038/nature05945.
10. Shaw AT, Varghese AM, Solomon BJ, Costa DB, Novello S, Mino-Kenudson M, Awad MM, Engelman JA, Riely GJ, Monica V, Yeap BY, Scagliotti GV. Pemetrexed-based chemotherapy in patients with advanced, ALK-positive

- non-small cell lung cancer. *Ann Oncol.* 2013; 24: 59-66. doi: 10.1093/annonc/mds242.
11. Shaw AT, Engelman JA. ALK in lung cancer: past, present, and future. *J Clin Oncol.* 2013; 31: 1105-11. doi: 10.1200/JCO.2012.44.5353.
  12. Shaw AT, Kim DW, Nakagawa K, Seto T, Crino L, Ahn MJ, De Pas T, Besse B, Solomon BJ, Blackhall F, Wu YL, Thomas M, O'Byrne KJ, et al. Crizotinib versus chemotherapy in advanced ALK-positive lung cancer. *N Engl J Med.* 2013; 368: 2385-94. doi: 10.1056/NEJMoa1214886.
  13. Shaw AT, Kim DW, Mehra R, Tan DS, Felip E, Chow LQ, Camidge DR, Vansteenkiste J, Sharma S, De Pas T, Riely GJ, Solomon BJ, Wolf J, et al. Ceritinib in ALK-rearranged non-small-cell lung cancer. *N Engl J Med.* 2014; 370: 1189-97. doi: 10.1056/NEJMoa1311107.
  14. Shaw AT, Yeap BY, Mino-Kenudson M, Digumarthy SR, Costa DB, Heist RS, Solomon B, Stubbs H, Admane S, McDermott U, Settleman J, Kobayashi S, Mark EJ, et al. Clinical features and outcome of patients with non-small-cell lung cancer who harbor EML4-ALK. *J Clin Oncol.* 2009; 27: 4247-53. doi: 10.1200/JCO.2009.22.6993.
  15. Rooper LM, Nikolskaia O, Carter J, Ning Y, Lin MT, Maleki Z. A Single EBUS-TBNA Procedure Can Support a Large Panel of Immunohistochemical Stains, Specific Diagnostic Subtyping, and Multiple Gene Analyses in the Majority of Non-Small Cell Lung Cancer Cases. *Hum Pathol.* 2016; doi: 10.1016/j.humpath.2015.12.025.
  16. Witt BL, Cohen MB, Chadwick BE, Stephenson PD, Abasolo P, Schmidt RL. Cytomorphology is often insufficient to categorize non-small-cell lung carcinoma on FNA specimens. *Diagn Cytopathol.* 2016; 44: 73-9. doi: 10.1002/dc.23387.
  17. Li T, Kung HJ, Mack PC, Gandara DR. Genotyping and genomic profiling of non-small-cell lung cancer: implications for current and future therapies. *J Clin Oncol.* 2013; 31: 1039-49. doi: 10.1200/JCO.2012.45.3753.
  18. Midha A, Dearden S, McCormack R. EGFR mutation incidence in non-small-cell lung cancer of adenocarcinoma histology: a systematic review and global map by ethnicity (mutMapII). *Am J Cancer Res.* 2015; 5: 2892-911.
  19. Zhang Y, He D, Fang W, Kang S, Chen G, Hong S, Sheng J, Zhan J, Chen N, Hu Z, Xue C, Yang Y, Ma Y, et al. The Difference of Clinical Characteristics Between Patients With Exon 19 Deletion and Those With L858R Mutation in Nonsmall Cell Lung Cancer. *Medicine (Baltimore).* 2015; 94: e1949. doi: 10.1097/MD.0000000000001949.
  20. Matam K, Goud I, Lakshmi MA, Ravi V, Sridhar K, Vijayanand PR, Chakravarthy S, Prasad SV, Tabassum SN, Shaik NA, Syed R, Alharbi KK, Khan IA. Correlation between EGFR Gene Mutations and Lung Cancer: a Hospital-Based Study. *Asian Pac J Cancer Prev.* 2015; 16: 7071-6.
  21. Casadio C, Guarize J, Donghi S, Di Tonno C, Fumagalli C, Vacirca D, Dell'Orto P, De Marinis F, Spaggiari L, Viale G, Barberis M. Molecular Testing for Targeted Therapy in Advanced Non-Small Cell Lung Cancer: Suitability of Endobronchial Ultrasound Transbronchial Needle Aspiration. *Am J Clin Pathol.* 2015; 144: 629-34. doi: 10.1309/AJCPXGRAIMB4CTQ3.
  22. Bayliss R, Choi J, Fennell DA, Fry AM, Richards MW. Molecular mechanisms that underpin EML4-ALK driven cancers and their response to targeted drugs. *Cell Mol Life Sci.* 2016; 73: 1209-24. doi: 10.1007/s00018-015-2117-6.
  23. Hallberg B, Palmer RH. Mechanistic insight into ALK receptor tyrosine kinase in human cancer biology. *Nat Rev Cancer.* 2013; 13: 685-700. doi: 10.1038/nrc3580.
  24. Camidge DR, Bang YJ, Kwak EL, Iafrate AJ, Varella-Garcia M, Fox SB, Riely GJ, Solomon B, Ou SH, Kim DW, Salgia R, Fidias P, Engelman JA, et al. Activity and safety of crizotinib in patients with ALK-positive non-small-cell lung cancer: updated results from a phase 1 study. *Lancet Oncol.* 2012; 13: 1011-9. doi: 10.1016/S1470-2045(12)70344-3.
  25. Thunnissen E, Bubendorf L, Dietel M, Elmberger G, Kerr K, Lopez-Rios F, Moch H, Olszewski W, Pauwels P, Penault-Llorca F, Rossi G. EML4-ALK testing in non-small cell carcinomas of the lung: a review with recommendations. *Virchows Arch.* 2012; 461: 245-57. doi: 10.1007/s00428-012-1281-4.
  26. Houang M, Toon CW, Clarkson A, Sioson L, Watson N, Farzin M, Selinger CI, Chou A, Morey AL, Cooper WA, O'Toole SA, Gill AJ. Reflex ALK immunohistochemistry is feasible and highly specific for ALK gene rearrangements in lung cancer. *Pathology.* 2014; 46: 383-8. doi: 10.1097/PAT.0000000000000114.
  27. Blackhall FH, Peters S, Bubendorf L, Dafni U, Kerr KM, Hager H, Soltermann A, O'Byrne KJ, Doms C, Sejda A, Hernandez-Losa J, Marchetti A, Savic S, et al. Prevalence and clinical outcomes for patients with ALK-positive resected stage I to III adenocarcinoma: results from the European Thoracic Oncology Platform Lungscape Project. *J Clin Oncol.* 2014; 32: 2780-7. doi: 10.1200/JCO.2013.54.5921.
  28. Moskalev EA, Frohnauer J, Merkelbach-Bruse S, Schildhaus HU, Dimmler A, Schubert T, Boltze C, Konig H, Fuchs F, Sirbu H, Rieker RJ, Agaimy A, Hartmann A, et al. Sensitive and specific detection of EML4-ALK rearrangements in non-small cell lung cancer (NSCLC) specimens by multiplex amplicon RNA massive parallel sequencing. *Lung Cancer.* 2014; 84: 215-21. doi: 10.1016/j.lungcan.2014.03.002.
  29. Robesova B, Bajerovala M, Liskova K, Skrickova J, Tomiskova M, Pospisilova S, Mayer J, Dvorakova D. TaqMan based real time PCR assay targeting EML4-ALK fusion transcripts in NSCLC. *Lung Cancer.* 2014; 85: 25-30. doi: 10.1016/j.lungcan.2014.04.002.

30. Ying J, Guo L, Qiu T, Shan L, Ling Y, Liu X, Lu N. Diagnostic value of a novel fully automated immunochemistry assay for detection of ALK rearrangement in primary lung adenocarcinoma. *Ann Oncol*. 2013; 24: 2589-93. doi: 10.1093/annonc/mdt295.
31. Liang W, He Q, Chen Y, Chuai S, Yin W, Wang W, Peng G, Zhou C, He J. Metastatic EML4-ALK fusion detected by circulating DNA genotyping in an EGFR-mutated NSCLC patient and successful management by adding ALK inhibitors: a case report. *BMC Cancer*. 2015; 16: 62. doi: 10.1186/s12885-016-2088-5.
32. Li W, Zhang Z, Guo L, Qiu T, Ling Y, Cao J, Guo H, Zhao H, Li L, Ying J. Assessment of cytology based molecular analysis to guide targeted therapy in advanced non-small-cell lung cancer. *Oncotarget*. 2016; 7: 8332-40. doi: 10.18632/oncotarget.6671.
33. Duan H, Lu J, Lu T, Gao J, Zhang J, Xu Y, Wang M, Wu H, Liang Z, Liu T. Comparison of EGFR mutation status between plasma and tumor tissue in non-small cell lung cancer using the Scorpion ARMS method and the possible prognostic significance of plasma EGFR mutation status. *Int J Clin Exp Pathol*. 2015; 8: 13136-45.
34. Que D, Xiao H, Zhao B, Zhang X, Wang Q, Xiao H, Wang G. EGFR mutation status in plasma and tumor tissues in non-small cell lung cancer serves as a predictor of response to EGFR-TKI treatment. *Cancer Biol Ther*. 2016; 17: 320-7. doi: 10.1080/15384047.2016.1139238.
